# Supplementary material
Source: PubMed Central journal article supplement (PMC2915408)
Supplement: neo1208_0637SD1.pdf [file neo1208_0637SD1.pdf]

## Supplemental Material

### *Primer Sets Used in Polymerase Chain Reaction and Sequencing Experiments for BRAF, NRAS, MC1R, PTEN, and PI3K*

Supp Data: Primer Sets:

BRAF Exon 15 Forward: 5'-3' ATCTACTGTTTTTCCTTTACTT

Reverse: 5'-3'TAGTAACTCAGCAGCATCT

MC1R Forward: 5'-3'GCAGCACCATGAACTAAGCA

Reverse: 5'-3'CAGGGTCACACAGGAACCA

NRAS Exon 2 Forward: 5'-3'TCGCCTGTCCTCATGTATTG

Reverse: 5'-3'ATGACTTGCTATTATTGATGG

PTEN Exon 1-9 Forward: Exon (1)5'-3'TTTCCATCCTGCAGAAGAAGC

(2):5'-3'GTTTGATTGCTGCATATTTTCAGAT

(3):5'-3'ATTTCAAATGTTAGCTCATTTTTGTT

(4):5'-3'TACTTTTTTTTCTCCTAAGTGCAAAA

(5):5'-3'TTAAATACCTGTTAAGTTTGATGCAA

(6):5'-3'ATAATGGAACATTTTTTTCAATTTGG

(7):5'-3'CAGTTAAAGGCATTTCCCTGTGA

(8):5'-3'AGGTGACAGATTTCTTTTTTAAAAAA

(9):5'-3'GCTTAAAAATTAATATGTTTCATCTGC

Reverse(1):5'-3' CACAAAATATATGACCTAGCAACCTG

(2):5'-3'TCTTTTTCTGTGGCTTAGAAATCTTT

(3):5'-3'ACTCTAACCAAGCAGATAACTTCACTT

(4):5'-3'GACAGTAAGATACAGTCTATCGGGTTT

(5):5'-3'ACACCTCAATAAAACTGAAGGAAAA

(6):5'-3'GGTTAAGAAAAGTTCCAATACATG

(7):5'-3'TTAAATCTGTCCTTATTTGGATATTT

(8):5'-3'TCACATACATACAAGTCAACAACCC

(9):5'-3'ATTGCCATTAATAAAAAAAAAAAGGTC

PI3KC Forward Exon (9):5'-3'GGGAAAAATATGACAAAAGAAAGC

(20):5'-3'CTCAATGATGCTTGGCTCTG

Reverse(9):5'-3'CTGAGATCAGCCAAATTCAGTT

(20):5'-3'TGGAATCCAGAGTGAGCTTTC
